# Supplementary material for: Intra-articular facet joint injections for low back pain: a systematic review
Source: Springer Nature journal article supplement (doi:10.1007/s00586-016-4455-y), 2016-02-23
Supplement: MOESM1 [file 8607896]

## Facet joint injections for low back pain

### Appendices

#### Appendix 1. Search strategies

##### Medline (Ovid)

1. Randomized controlled trial.pt.
2. Controlled clinical trial.pt.
3. Comparative study.pt.
4. Clinical trial.pt.
5. randomized.ab.
6. placebo.ab,ti.
7. drug therapy.fs.
8. randomly.ab,ti.
9. trial.ab,ti.
10. groups.ab,ti.
11. or/1-10
12. (animals not (humans and animals)).sh.
13. 11 not 12
14. dorsalgia.ti,ab.
15. exp Back Pain/
16. backache.ti,ab.
17. exp Low Back Pain/
18. (lumbar adj pain).ti,ab.
19. coccyx.ti,ab.
20. coccydynia.ti,ab.
21. sciatica.ti,ab.
22. sciatic neuropathy/
23. spondylosis.ti,ab.
24. lumbago.ti,ab.
25. back disorder\$.ti,ab.
26. or/14-25
27. 13 and 26
28. (facet adj joints).ti,ab.
29. facet joint\*.mp.
30. exp Zygapophyseal Joint/
31. zygapophysial\*.mp.
32. apophyseal\*.mp.
33. z?joint\*.mp.
34. or/28-33
35. exp Injections/
36. inject\*.mp.
37. 35 or 36
38. glucocorticoid\*.mp.
39. exp Glucocorticoids/
40. exp Anti-Inflammatory Agents/
41. anti?inflammatory.mp.

42. steroid\*.mp.
43. corticosteroid\*.mp.
44. or/38-43
45. 27 and 34 and 37 and 44

**Embase (OVID)**

1. Clinical Article/
2. exp Clinical Study/
3. Clinical Trial/
4. Controlled Study/
5. Randomized Controlled Trial/
6. Major Clinical Study/
7. Double Blind Procedure/
8. Multicenter Study/
9. Single Blind Procedure/
10. Phase 3 Clinical Trial/
11. Phase 4 Clinical Trial/
12. crossover procedure/
13. placebo/
14. or/1-13
15. allocat\$.mp.
16. assign\$.mp.
17. blind\$.mp.
18. (clinic\$ adj25 (study or trial)).mp.
19. compar\$.mp.
20. control\$.mp.
21. cross?over.mp.
22. factorial\$.mp.
23. follow?up.mp.
24. placebo\$.mp.
25. prospectiv\$.mp.
26. random\$.mp.
27. ((singl\$ or doubl\$ or trebl\$ or tripl\$) adj25 (blind\$ or mask\$)).mp.
28. trial.mp.
29. (versus or vs).mp.
30. or/15-29
31. 14 and 30
32. exp animals/ or exp invertebrate/ or animal experiment/ or animal model/ or animal tissue/  
or animal cell/ or nonhuman/
33. human/ or normal human/ or human cell/
34. 32 and 33
35. 32 not 34
36. 31 not 35
37. dorsalgia.mp.
38. back pain.mp.
39. exp Low Back Pain/
40. exp Backache/
41. (lumbar adj pain).mp.

42. coccyx.mp.
43. coccydynia.mp.
44. sciatica.mp.
45. exp Ischialgia/
46. spondylosis.mp.
47. lumbago.mp.
48. back disorder\$.ti,ab.
49. or/37-48
50. (facet adj joints).mp.
51. exp zygapophyseal joint/
52. zygapophysial\*.mp.
53. apophyseal\*.mp.
54. z?joint\*.mp.
55. or/50-54
56. exp injection/
57. inject\*.mp.
58. 56 or 57
59. glucocorticoid\*.mp.
60. exp Glucocorticoid/
61. anti?inflammatory agent.mp.
62. exp Antiinflammatory Agent/
63. steroid\*.mp.
64. corticosteroid\*.mp.
65. or/59-64
66. 31 and 36 and 49 and 55 and 58 and 65

## CINHAL

- S60 S48 AND S51 AND S54 AND S59
- S59 S55 OR S56 OR S57 OR S58
- S58 corticosteroid\*
- S57 steroid\*
- S56 (MH "Antiinflammatory Agents, Steroidal+")
- S55 (MH "Glucocorticoids+")
- S54 S52 OR S53
- S53 inject\*
- S52 (MH "Injections+")
- S51 S49 OR S50
- S50 (MH "Zygapophyseal Joint") OR zygapophysial OR apophyseal OR z-joint OR z joint
- S49 facet w1 joint
- S48 S35 OR S43 OR S47
- S47 S44 OR S45 OR S46
- S46 "lumbago"
- S45 (MH "Spondylolisthesis") OR (MH "Spondylolysis")
- S44 (MH "Thoracic Vertebrae")
- S43 S36 OR S37 OR S38 OR S39 OR S40 OR S41 OR S42
- S42 lumbar N2 vertebra
- S41 (MH "Lumbar Vertebrae")

- S40 "coccydynia" OR "back disorder\*"
- S39 "coccyx"
- S38 "sciatica"
- S37 (MH "Sciatica")
- S36 (MH "Coccyx")
- S35 S29 OR S30 OR S31 OR S32 OR S33 OR S34
- S34 lumbar N5 pain
- S33 lumbar W1 pain
- S32 "backache"
- S31 (MH "Low Back Pain")
- S30 (MH "Back Pain+")
- S29 "dorsalgia"
- S28 S26 NOT S27
- S27 (MH "Animals")
- S26 S7 OR S12 OR S19 OR S25
- S25 S20 OR S21 OR S22 OR S23 OR S24
- S24 volunteer\*
- S23 prospectiv\*
- S22 control\*
- S21 followup stud\*
- S20 follow-up stud\*
- S19 S13 OR S14 OR S15 OR S16 OR S17 OR S18
- S18 (MH "Prospective Studies+")
- S17 (MH "Evaluation Research+")
- S16 (MH "Comparative Studies")
- S15 latin square
- S14 (MH "Study Design+")
- S13 (MH "Random Sample")
- S12 S8 OR S9 OR S10 OR S11
- S11 random\*
- S10 placebo\*
- S9 (MH "Placebos")
- S8 (MH "Placebo Effect")
- S7 S1 OR S2 OR S3 OR S4 OR S5 OR S6
- S6 triple-blind
- S5 single-blind
- S4 double-blind
- S3 clinical w3 trial
- S2 "randomi?ed controlled trial\*"
- S1 (MH "Clinical Trials+")

#### CENTRAL

- #1 MeSH descriptor: [Back Pain] explode all trees
- #2 back near pain
- #3 dorsalgia
- #4 back disorder\*
- #5 backache
- #6 MeSH descriptor: [Low Back Pain] explode all trees
- #7 (lumbar next pain)

- #8 (#1 or #2 or #3 or #4 or #5 or #6 or #7)
- #9 MeSH descriptor: [Zygapophyseal Joint] explode all trees
- #10 facet near joints
- #11 zygapophysial\*
- #12 apophyseal\*
- #13 z-joint\*
- #14 z joint\*
- #15 (#9 or #10 or #11 or #12 or #13 or #14)
- #16 (#8 and #15)

### Index to Chiropractic Literature

- S1 , Publication Type:Clinical Trial
- S2 , Publication Type:Controlled Clinical Trial
- S3 , Publication Type:Randomized Controlled Trial
- S4 Subject:"Clinical Trials" OR Subject:"Clinical Trials as Topic" OR Subject:"Controlled Clinical Trials"
- S5 Subject:"Randomized Controlled Trials as Topic" OR Subject:"Prospective Studies" OR Subject:"comparative studies"
- S6 All Fields:random\* OR All Fields:placebo\* OR All Fields:sham\*
- S7 All Fields:versus OR All Fields:vs
- S8 All Fields:"clinical trial" OR All Fields:"controlled trial"
- S9 All Fields:double-blind OR All Fields:"double blind"
- S10 All Fields:single-blind OR All Fields:"single blind"
- S11 S1 OR S2 OR S3 OR S4 OR S5 OR S6 OR S7 OR S8 OR S9 OR S10
- S12 Subject:"back" OR Subject:"back injuries" OR Subject:"back pain"
- S13 Subject:"low back pain" OR Subject:"lumbar" OR Subject:"lumbosacral region"
- S14 Subject:"sciatica" OR All Fields:sciatica
- S15 Subject:"coccyx" OR Subject:"sacroiliac joint" OR Subject:"sacrum"
- S16 S12 OR S13 OR S14 OR S15
- S17 S11 AND S16
- S18 All Fields:"facet joint" OR All Fields:"Zygapophyseal Joint" OR All Fields:"zygapophysial"
- S19 All Fields:"apophyseal" OR All Fields:"z-joint" OR All Fields:"z joint"
- S20 S18 OR S19
- S21 S17 AND S20

### ClinicalTrials.gov

Basic search: "facet joints" and back pain

### WHO ICTRP

Basic search: "facet joints" and back pain

Appendix 2. Excluded studies

| <b>Table 2: Excluded studies and reason for exclusion</b> |                                                                           |
|-----------------------------------------------------------|---------------------------------------------------------------------------|
| <b>Beliveau 1971[1]</b>                                   | Used epidural anaesthesia                                                 |
| <b>Breivik 1976[2]</b>                                    | Used epidural injections                                                  |
| <b>Lie 1984[3]</b>                                        | Cohort study in Norwegian, not an RCT                                     |
| <b>Lau 1985[4]</b>                                        | No control group, not an RCT                                              |
| <b>Sonne 1985[5]</b>                                      | Steroid vs Saline but injections at iliolumbar ligament, not facet joints |
| <b>Lynch 1986[6]</b>                                      | Sham control group selected on basis of missed injection, not an RCT      |
| <b>Garvey 1989[7]</b>                                     | Intervention was injections at trigger points, not facet joints           |
| <b>Rocco 1989[8]</b>                                      | Epidurals                                                                 |
| <b>Collee 1991[9]</b>                                     | Intervention was a local anaesthetic, not a steroid injection             |
| <b>Marks 1992[10]</b>                                     | Facet joint injection vs facet nerve block                                |
| <b>Serrao 1992[11]</b>                                    | Intrathecal midazolam vs epidural steroid                                 |
| <b>Gallagher 1994[12]</b>                                 | Radiofrequency denervation                                                |
| <b>Revel 1999[13]</b>                                     | Lidocaine vs saline                                                       |
| <b>van Kleef 1999[14]</b>                                 | Radiofrequency denervation                                                |
| <b>Mauro 2000[15]</b>                                     | Intramuscular B12 injection                                               |
| <b>Leclaire 2001[16]</b>                                  | Radiofrequency denervation                                                |
| <b>Manchikanti 2001[17]</b>                               | Lumbar facet joint nerve block, not intraarticular facet joint injection  |
| <b>Aldrete 2003[18]</b>                                   | Used epidural injections                                                  |
| <b>Geurts 2003[19]</b>                                    | Radiofrequency lesioning of dorsal root ganglia                           |
| <b>Lierz 2004[20]</b>                                     | Epidural anaesthetic                                                      |
| <b>Fuchs 2005[21]</b>                                     | Intraarticular hyaluronic acid vs glucocorticoid injections               |
| <b>Shih C 2005[22]</b>                                    | Controls injected with corticosteroid but selected based on poor response |
| <b>Takada 2005[23]</b>                                    | Epidural                                                                  |
| <b>van Wijk 2005[24]</b>                                  | Radiofrequency denervation                                                |
| <b>Hayes 2006[25]</b>                                     | Structured abstract only                                                  |
| <b>Gorbach 2006[26]</b>                                   | No control group                                                          |
| <b>Manchikanti 2007[27]</b>                               | Lumbar nerve blocks vs local anaesthetic                                  |
| <b>Tekin 2007[28]</b>                                     | Radiofrequency denervation                                                |
| <b>Ackerman 2008[29]</b>                                  | Intra-articular vs medial branch nerve block                              |
| <b>Manchikanti 2008[30]</b>                               | Lumbar nerve blocks vs local anaesthetic                                  |
| <b>Nath 2008[31]</b>                                      | Radiofrequency neurotomy                                                  |
| <b>Manchikanti 2010[32]</b>                               | Lumbar nerve blocks vs local anaesthetic                                  |
| <b>Maas 2012[33]</b>                                      | Cost-effectiveness study with no pain or disability outcome               |
| <b>Yun 2012 [34]</b>                                      | Comparison of two injection techniques (fluoroscopy and ultrasonography). |
| <b>Lakemeier 2013 [35]</b>                                | Comparator radiofrequency denervation                                     |
| <b>Kennedy 2013[36]</b>                                   | Abstract only, no manuscript available                                    |

## References

1. Beliveau P (1971) A comparison between epidural anaesthesia with and without corticosteroid in the treatment of sciatica. *Rheumatology and physical medicine* 11 (1):40-43
2. Breivik H, Hesla P, Molnar I, Lind B (1976) Treatment of chronic low back pain and sciatica. Comparison of caudal epidural injections of bupivacaine and methylprednisolone with bupivacaine followed by saline. *Adv Pain Res Ther* 1:927-932
3. Lie H, Ljunggren AE, Dugstad G (1984) [The lumbar facet joint syndrome. A prospective study]. *Tidsskrift for den Norske laegeforening : tidsskrift for praktisk medicin, ny raekke* 104 (24):1643-1647
4. Lau LS, Littlejohn GO, Miller MH (1985) Clinical evaluation of intra-articular injections for lumbar facet joint pain. *The Medical journal of Australia* 143 (12-13):563-565
5. Sonne M, Christensen K, Hansen SE, Jensen EM (1985) Injection of steroids and local anaesthetics as therapy for low-back pain. *Scandinavian journal of rheumatology* 14 (4):343-345
6. Lynch M, Taylor J (1986) Facet joint injection for low back pain. A clinical study. *Journal of Bone & Joint Surgery, British Volume* 68-B (1):138-141
7. GARVEY TA, MARKS MR, WIESEL SW (1989) A Prospective, Randomized, Double-Blind Evaluation of Trigger-Point Injection Therapy for Low-Back Pain. *Spine* 14 (9):962-964
8. Rocco AG, Frank E, Kaul AF, Lipson SJ, Gallo JP (1989) Epidural steroids, epidural morphine and epidural steroids combined with morphine in the treatment of post-laminectomy syndrome. *Pain* 36 (3):297-303. doi:[http://dx.doi.org/10.1016/0304-3959\(89\)90088-2](http://dx.doi.org/10.1016/0304-3959(89)90088-2)
9. Collee G, Dijkmans BA, Vandenbroucke JP, Cats A (1991) Iliac crest pain syndrome in low back pain. A double blind, randomized study of local injection therapy. *The Journal of rheumatology* 18 (7):1060-1063
10. Marks RC, Houston T, Thulbourne T (1992) Facet joint injection and facet nerve block: a randomised comparison in 86 patients with chronic low back pain. *Pain* 49 (3):325-328. doi:[http://dx.doi.org/10.1016/0304-3959\(92\)90239-8](http://dx.doi.org/10.1016/0304-3959(92)90239-8)
11. Serrao JM, Marks RL, Morley SJ, Goodchild CS (1992) Intrathecal midazolam for the treatment of chronic mechanical low back pain: a controlled comparison with epidural steroid in a pilot study. *Pain* 48 (1):5-12. doi:[http://dx.doi.org/10.1016/0304-3959\(92\)90125-U](http://dx.doi.org/10.1016/0304-3959(92)90125-U)
12. Gallagher J (1994) Radiofrequency facet joint denervation in the treatment of low back pain : a prospective controlled doubleblind study to assess its efficacy. *The Pain Clinic* 7:193-198
13. Revel M, Poiraudou S, Auleley GR, Payan C, Denke A, Nguyen M, Chevrot A, Fermanian J (1998) Capacity of the clinical picture to characterize low back pain relieved by facet joint anesthesia. Proposed criteria to identify patients with painful facet joints. *Spine (Phila Pa 1976)* 23 (18):1972-1976; discussion 1977
14. van Kleef M, Barendse GAM, Kessels A, Voets HM, Weber WEJ, de Lange S (1999) Randomized Trial of Radiofrequency Lumbar Facet Denervation for Chronic Low Back Pain. *Spine* 24 (18):1937
15. Mauro GL, Martorana U, Cataldo P, Brancato G, Letizia G (2000) Vitamin B12 in low back pain: a randomised, double-blind, placebo-controlled study. *European review for medical and pharmacological sciences* 4 (3):53-58
16. Leclaire R, Fortin L, Lambert R, Bergeron YM, Rossignol M (2001) Radiofrequency facet joint denervation in the treatment of low back pain: a placebo-controlled clinical trial to assess efficacy. *Spine (Phila Pa 1976)* 26 (13):1411-1416; discussion 1417
17. Manchikanti L, Singh V, Pampati V, Damron KS, Barnhill RC, Beyer C, Cash KA (2001) Evaluation of the relative contributions of various structures in chronic low back pain. *Pain physician* 4 (4):308-316
18. Aldrete JA (2003) Epidural Injections of Indomethacin for Postlaminectomy Syndrome: A Preliminary Report. *Anesthesia & Analgesia* 96 (2):463-468. doi:10.1213/00000539-200302000-00031

19. Geurts JWM, van Wijk RMAW, Wynne HJ, Hammink E, Buskens E, Lousberg R, Knape JTA, Groen GJ (2003) Radiofrequency lesioning of dorsal root ganglia for chronic lumbosacral radicular pain: a randomised, double-blind, controlled trial. *The Lancet* 361 (9351):21-26. doi:10.1016/S0140-6736(03)12115-0
20. Lierz P, Gustorff B, Markow G, Felleiter P (2004) Comparison between bupivacaine 0.125% and ropivacaine 0.2% for epidural administration to outpatients with chronic low back pain. *European Journal of Anaesthesiology* 21 (01):32-37. doi:doi:10.1017/S0265021504001061
21. Fuchs S, Erbe T, Fischer H-L, Tibesku CO (2005) Intraarticular Hyaluronic Acid versus Glucocorticoid Injections for Nonradicular Pain in the Lumbar Spine. *Journal of Vascular and Interventional Radiology* 16 (11):1493-1498. doi:10.1097/01.RVI.0000175334.60638.3F
22. Shih C, Lin G-Y, Yueh K-C, Lin J-J (2005) Lumbar Zygapophyseal Joint Injections in Patients with Chronic Lower Back Pain. *Journal of the Chinese Medical Association* 68 (2):59-64. doi:10.1016/S1726-4901(09)70136-4
23. Takada M, Fukusaki M, Terao Y, Yamashita K, Inadomi C, Sumikawa K (2005) Comparative efficacy of ropivacaine and bupivacaine for epidural block in outpatients with degenerative spinal disease and low back pain. *The Pain Clinic* 17 (3):275-281. doi:doi:10.1163/1568569054729481
24. van Wijk RM, Geurts JW, Wynne HJ, Hammink E, Buskens E, Lousberg R, Knape JT, Groen GJ (2005) Radiofrequency denervation of lumbar facet joints in the treatment of chronic low back pain: a randomized, double-blind, sham lesion-controlled trial. *The Clinical journal of pain* 21 (4):335-344
25. Hayes, Inc (2006) Facet blocks for chronic back pain (Structured abstract). *Health Technology Assessment Database* (4)
26. Gorbach C, Schmid MR, Elfering A, Hodler J, Boos N (2006) Therapeutic Efficacy of Facet Joint Blocks. *American Journal of Roentgenology* 186 (5):1228-1233. doi:10.2214/AJR.04.1042
27. Manchikanti L, Manchikanti K, Manchukonda R, Cash K, Damron K, Pampati V, McManus C (2007) Evaluation of lumbar facet joint nerve blocks in the management of chronic low back pain: a preliminary report of a randomized, double-blind controlled trial: *Clinical Trial* NCT00355914. *Pain physician* 10 (3):425
28. Tekin I, Mirzai H, Ok G, Erbuyun K, Vatansever D (2007) A Comparison of Conventional and Pulsed Radiofrequency Denervation in the Treatment of Chronic Facet Joint Pain. *The Clinical Journal of Pain* 23 (6):524-529. doi:10.1097/AJP.0b013e318074c99c
29. Ackerman WE, Ahmad M (2008) Pain relief with intraarticular or medial branch nerve blocks in patients with positive lumbar facet joint SPECT imaging: a 12-week outcome study. *South Med J* 101 (9):931-934. doi:10.1097/smj.0b013e31817e6ffb
30. Manchikanti L, Singh V, Falco F, Cash KA, Pampati V (2008) Lumbar facet joint nerve blocks in managing chronic facet joint pain: One-year follow-up of a randomized, double-blind controlled trial: *Clinical Trial* NCT00355914. *Pain physician* 11 (2):121-132
31. Nath S, Nath CA, Pettersson K (2008) Percutaneous Lumbar Zygapophysial (Facet) Joint Neurotomy Using Radiofrequency Current, in the Management of Chronic Low Back Pain: A Randomized Double-Blind Trial. *Spine* 33 (12):1291-1297. doi:10.1097/BRS.0b013e31817329f0
32. Manchikanti L, Singh V, Falco FJE, Cash KA, Pampati V (2010) Evaluation of Lumbar Facet Joint Nerve Blocks in Managing Chronic Low Back Pain: A Randomized, Double-Blind, Controlled Trial with a 2-Year Follow-Up. *International Journal of Medical Sciences* 7 (3):124-135
33. Maas ET, Juch JN, Groeneweg JG, Ostelo RW, Koes BW, Verhagen AP, van Raamt M, Wille F, Huygen FJ, van Tulder MW (2012) Cost-effectiveness of minimal interventional procedures for chronic mechanical low back pain: design of four randomised controlled trials with an economic evaluation. *BMC Musculoskelet Disord* 13:260. doi:10.1186/1471-2474-13-260

34. Yun DH, Kim HS, Yoo SD, Kim DH, Chon JM, Choi SH, Hwang DG, Jung PK (2012) Efficacy of ultrasonography-guided injections in patients with facet syndrome of the low lumbar spine. *Annals of rehabilitation medicine* 36 (1):66-71. doi:10.5535/arm.2012.36.1.66
35. Lakemeier S, Lind M, Schultz W, Fuchs-Winkelmann S, Timmesfeld N, Foelsch C, Peterlein CD (2013) A comparison of intraarticular lumbar facet joint steroid injections and lumbar facet joint radiofrequency denervation in the treatment of low back pain: a randomized, controlled, double-blind trial. *Anesthesia and analgesia* 117 (1):228-235. doi:10.1213/ANE.0b013e3182910c4d
36. Kennedy DJ, Stout AA, Conrad B, Smuck M (2013) A randomized, double-blind, placebo-controlled, prospective study of intraarticular lumbar zygapophysial joint corticosteroid injection(s) as treatment of chronic low back pain in a selected population. *PM and R* 1):S286. doi:<http://dx.doi.org/10.1016/j.pmrj.2013.08.508>
